# Supplementary material
Source: HighWire-hosted journal article supplement (https://bmjopen.bmj.com/content/9/10/e028780)
Supplement: inline-supplementary-material-9 [file inline-supplementary-material-9.pdf]

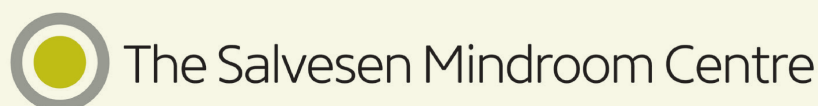

The Salvesen Mindroom Centre

Project delivered by

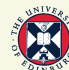

THE UNIVERSITY  
of EDINBURGH

In partnership with

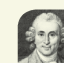

James  
Lind  
Alliance  
Priority Setting Partnerships

# Research priorities for learning difficulties

## Affected by learning difficulties?

Choose 10  
research  
priorities from  
our shortlist  
of 40.

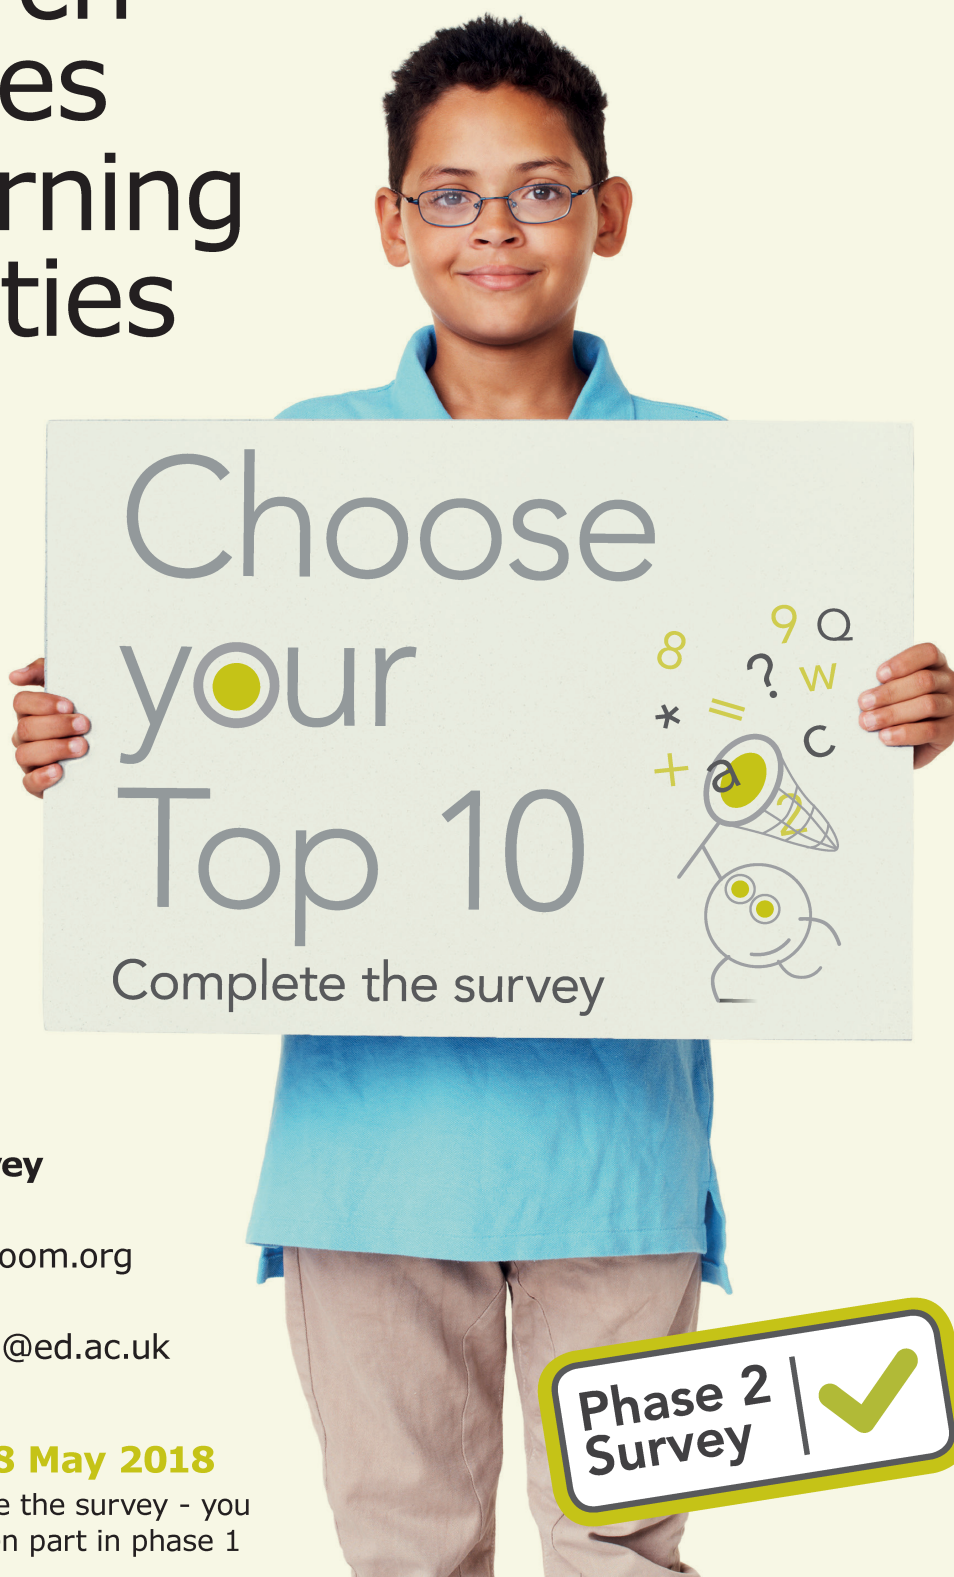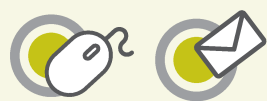

## Complete the survey online or by post

[www.SalvesenMindroom.org](http://www.SalvesenMindroom.org)

**Tel:** 0131 536 8898

**Email:** [LD\\_research@ed.ac.uk](mailto:LD_research@ed.ac.uk)

## Survey closes: 18 May 2018

All welcome to complete the survey - you  
don't need to have taken part in phase 1

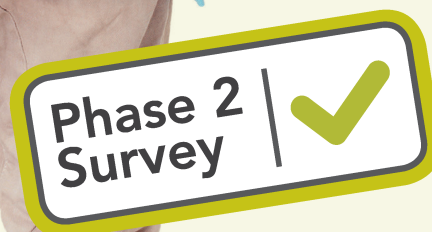

The Salvesen Mindroom Centre (formerly Mindroom)  
Scottish Charity No. SC030472

The University of Edinburgh  
Scottish Charity No. SC005336
